# Supplementary material
Source: publisher site journal article supplement (https://www.dovepress.com/article/530106)
Supplement: Supplementary file 1 [file 530106_Table_S1_Radial_Arterial_Puncture_Checklist.docx]

# Table S1. Radial Arterial Puncture Skill Assessment Checklist

Each item is scored as follows: 5 = Correctly performed, 3 = Partially performed, 0 = Not performed. Maximum total score = 40 points.

| Item | 5 points (Correct) | 3 points (Partial) | 0 points (Not performed) |
| --- | --- | --- | --- |
| 1. Identify radial artery puncture site | Correct palpation of artery location | Incorrect palpation | No palpation performed |
| 2. Patient positioning | Supination with wrist extension | Supination or wrist extension only | No positioning performed |
| 3. Disinfection | Both puncture site and gloves disinfected | Only puncture site or gloves disinfected | No disinfection performed |
| 4. Palpation technique | Correct finger placement for pulse localization | Incorrect finger placement | No palpation |
| 5. Needle angle (30°–45°) | Correct angle between 30° and 45° | Angle <30° or >45° | Incorrect technique |
| 6. Bevel orientation and blood collection | Bevel facing upward and syringe completely filled | Bevel facing upward or syringe completely filled | Incorrect bevel orientation or incomplete filling |
| 7. Post puncture compression | Firm pressure applied ≥5 minutes | Firm pressure applied <5 minutes | No compression applied |
| 8. Needle disposal | Correct one-hand needle covering technique | Incorrect technique | No disposal performed |
